# Supplementary material for: Preventing COVID-19 spread in closed facilities by regular testing of employees—An efficient intervention in long-term care facilities and prisons?
Source: PubMed Central journal article supplement (PMC8062045; doi:10.1371/journal.pone.0249588), 2021-04-22
Supplement: pone.0249588.s006.pdf [file pone.0249588.s006.pdf]

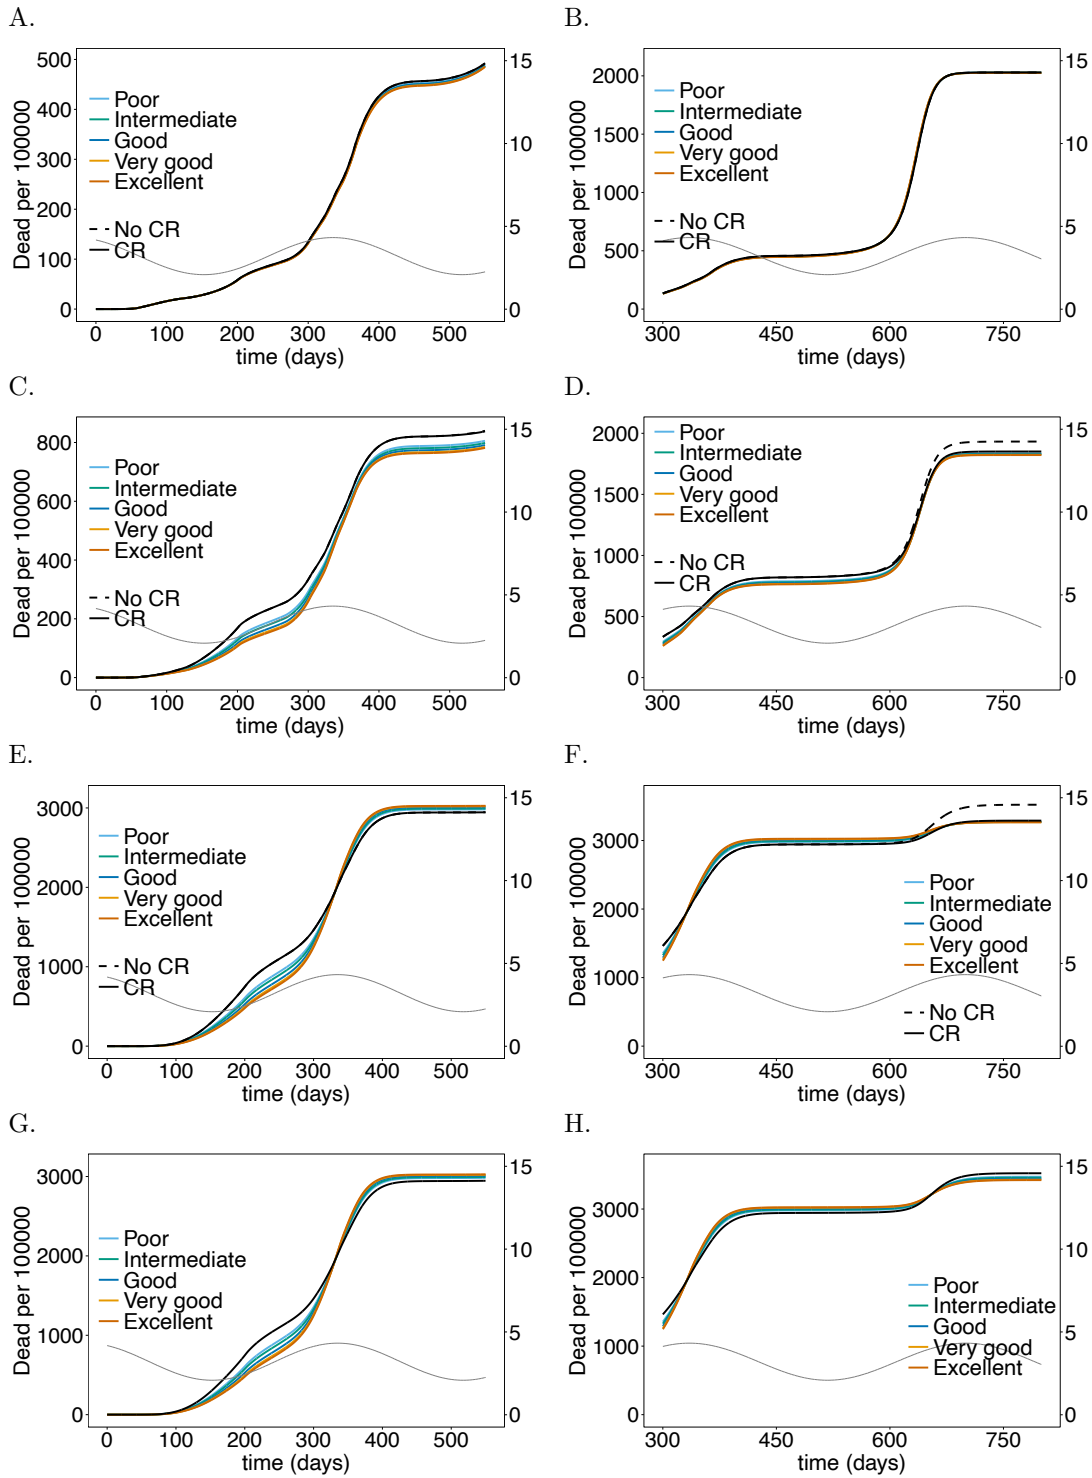

**S6 Fig. Impact of sensitivity when testing IF staff on mortality:**

As in Fig 7 but for U.S. IFs instead of German LTCFs. Parameters for contact reduction are given in [S7 Table](#).
