# Supplementary material for: Preventing COVID-19 spread in closed facilities by regular testing of employees—An efficient intervention in long-term care facilities and prisons?
Source: PubMed Central journal article supplement (PMC8062045; doi:10.1371/journal.pone.0249588), 2021-04-22
Supplement: pone.0249588.s008.pdf [file pone.0249588.s008.pdf]

**S1 Table.** (Sub-) population sizes of Germany (GER) and the USA chosen in simulations.

| Parameter         | Description                    | GER        | USA         |
|-------------------|--------------------------------|------------|-------------|
| $N$               | Total population size          | 83,000,000 | 331,000,000 |
| $N^{(\text{Ge})}$ | Size of general sub-population | 81,800,000 | 329,177,000 |
| $N^{(\text{St})}$ | Number of LTCF employees       | 500,000    | 423,000     |
| $N^{(\text{Ri})}$ | Size of risk group             | 700,000    | 1,400,000   |
