# Supplementary material for: Preventing COVID-19 spread in closed facilities by regular testing of employees—An efficient intervention in long-term care facilities and prisons?
Source: PubMed Central journal article supplement (PMC8062045; doi:10.1371/journal.pone.0249588), 2021-04-22
Supplement: pone.0249588.s009.pdf [file pone.0249588.s009.pdf]

**S2 Table.** Summary of model parameters and their choices for numerical simulations for Germany (GER) and USA.

| Parameter                       | Description                                                  | Value           |     |
|---------------------------------|--------------------------------------------------------------|-----------------|-----|
| $n_E$                           | Number of latent phase Erlang states                         | 16              |     |
| $n_P$                           | Number of prodromal Erlang states                            | 16              |     |
| $n_I$                           | Number of fully infectious Erlang states                     | 16              |     |
| $n_L$                           | Number of late infectious Erlang states                      | 16              |     |
| $D_E$                           | Average duration of latency period                           | 3.7 days        |     |
| $D_P$                           | Average duration of prodromal period                         | 1 day           |     |
| $D_I$                           | Average duration of fully infectious period                  | 5 days          |     |
| $D_L$                           | Average duration of late infectious period                   | 5 days          |     |
| $\varepsilon$                   | Transition rate of latent states                             | $n_E/D_E$       |     |
| $\varphi$                       | Transition rate of prodromal states                          | $n_P/D_P$       |     |
| $\gamma$                        | Transition rate of fully infectious states                   | $n_I/D_I$       |     |
| $\delta$                        | Transition rate of late infectious states                    | $n_L/D_L$       |     |
| $1/\alpha$                      | Waiting time for test results in days                        | 1/2, 1, 2, 3, 4 |     |
| $1/\xi$                         | Average frequency of testing in days                         | 1, 2, 5, 7, 14  |     |
|                                 |                                                              | GER             | USA |
| $f_{\text{Sick}}$               | Fraction of symptomatic (sick) infections in Ge and St       | 58%             | 58% |
| $f_{\text{Sick}}^{(\text{Ri})}$ | Fraction of symptomatic (sick) infections in Ri              | 60%             | 43% |
| $f_{\text{Dead}}$               | Fraction of sick ind. in Ge and St, who die from the disease | 1.6%            | 4%  |
| $f_{\text{Dead}}^{(\text{Ri})}$ | Fraction of sick ind. in Ri, who die from the disease        | 20%             | 11% |
| $f_{\text{Iso}}$                | Fraction of sick ind. who go to isolation                    | 58%             | 48% |

General sub-population (Ge), LTCF employees (St), risk group (Ri).
