# Supplementary material for: Preventing COVID-19 spread in closed facilities by regular testing of employees—An efficient intervention in long-term care facilities and prisons?
Source: PubMed Central journal article supplement (PMC8062045; doi:10.1371/journal.pone.0249588), 2021-04-22
Supplement: pone.0249588.s011.pdf [file pone.0249588.s011.pdf]

**S4 Table.** Summary of variables describing sub-population sizes in infectious (sub-)states in Germany (GER) and the USA.

| Name               | Description                                                                                      | Initial value |     |
|--------------------|--------------------------------------------------------------------------------------------------|---------------|-----|
| $P_k^{(Ge)}$       | No. infected Ge in $k$ th prodromal state ( $1 \leq k \leq n_P$ )                                | 0             |     |
| $P_k^{(St,-)}$     | No. infected undetected St in $k$ th prodromal state ( $1 \leq k \leq n_P$ )                     | 0             |     |
| $P_k^{(St,*)}$     | No. St in $k$ th prodromal state, whose test results will be pos. ( $1 \leq k \leq n_P$ )        | 0             |     |
| $P_k^{(St,+)}$     | No. pos. tested St in $k$ th prodromal state ( $1 \leq k \leq n_P$ )                             | 0             |     |
| $P_k^{(Ri)}$       | No. Ri in $k$ th prodromal state ( $1 \leq k \leq n_P$ )                                         | 0             |     |
| $P_{Sum}^{(Ge)}$   | Total No. of Ge in prodromal states                                                              | 0             |     |
| $P_{Sum}^{(St,-)}$ | Total No. undetected infected St in prodromal states                                             | 0             |     |
| $P_{Sum}^{(St,*)}$ | Total No. of St in prodromal states, whose test results will be pos.                             | 0             |     |
| $P_{Sum}^{(St,+)}$ | Total No. of pos. tested St in prodromal states                                                  | 0             |     |
| $P_{Sum}^{(Ri)}$   | Total No. of Ri in prodromal states                                                              | 0             |     |
|                    |                                                                                                  | GER           | USA |
| $I_1^{(Ge)}$       | No. infected Ge in 1st fully infectious state                                                    | 200           | 75  |
| $I_k^{(Ge)}$       | No. infected Ge in $k$ th fully infectious state ( $2 \leq k \leq n_I$ )                         | 0             | 0   |
| $I_{Sum}^{(Ge)}$   | Total No. of Ge in fully infectious states                                                       | 200           | 75  |
| $I_k^{(St,-)}$     | No. infected undetected St in $k$ th fully infectious state ( $1 \leq k \leq n_I$ )              | 0             |     |
| $I_k^{(St,*)}$     | No. St in $k$ th fully infectious state, whose test results will be pos. ( $1 \leq k \leq n_I$ ) | 0             |     |
| $I_k^{(St,+)}$     | No. pos. tested St in $k$ th fully infectious state ( $1 \leq k \leq n_I$ )                      | 0             |     |
| $I_k^{(Ri)}$       | No. Ri in $k$ th fully infectious state ( $1 \leq k \leq n_I$ )                                  | 0             |     |
| $I_{Sum}^{(St,-)}$ | Total No. undetected infected St in fully infectious states                                      | 0             |     |
| $I_{Sum}^{(St,*)}$ | Total No. of St in fully infectious states, whose test results will be pos.                      | 0             |     |
| $I_{Sum}^{(St,+)}$ | Total No. of pos. tested St in fully infectious states                                           | 0             |     |
| $I_{Sum}^{(Ri)}$   | Total No. of Ri in fully infectious states                                                       | 0             |     |
| $L_k^{(Ge)}$       | No. infected Ge in $k$ th late infectious state ( $1 \leq k \leq n_L$ )                          | 0             |     |
| $L_k^{(St,-)}$     | No. infected undetected St in $k$ th late infectious state ( $1 \leq k \leq n_L$ )               | 0             |     |
| $L_k^{(St,*)}$     | No. St in $k$ th late infected state, whose test results will be pos. ( $1 \leq k \leq n_L$ )    | 0             |     |
| $L_k^{(St,+)}$     | No. pos. tested St in $k$ th late infectious state ( $1 \leq k \leq n_L$ )                       | 0             |     |
| $L_k^{(Ri)}$       | No. Ri in $k$ th late infectious state ( $1 \leq k \leq n_L$ )                                   | 0             |     |
| $L_{Sum}^{(Ge)}$   | Total No. of Ge in late infectious states                                                        | 0             |     |
| $L_{Sum}^{(St,-)}$ | Total No. infected undetected individuals in late infectious state in St                         | 0             |     |
| $L_{Sum}^{(St,*)}$ | Total No. of St in late infected states, whose test results will be pos.                         | 0             |     |
| $L_{Sum}^{(St,+)}$ | Total No. of pos. tested St in late infectious states                                            | 0             |     |
| $L_{Sum}^{(Ri)}$   | Total No. of Ri in late infectious states                                                        | 0             |     |

Description of variables and their initial values chosen for the simulations.
