# Supplementary material for: Preventing COVID-19 spread in closed facilities by regular testing of employees—An efficient intervention in long-term care facilities and prisons?
Source: PubMed Central journal article supplement (PMC8062045; doi:10.1371/journal.pone.0249588), 2021-04-22
Supplement: pone.0249588.s012.pdf [file pone.0249588.s012.pdf]

**S5 Table.** Summary of model parameters describing the contact behavior for Germany (GER) and USA.

| Name                   | Description                                                         | Value/Eq. |        |
|------------------------|---------------------------------------------------------------------|-----------|--------|
|                        |                                                                     | GER       | USA    |
| $\lambda_{\text{Ext}}$ | Infections from outside of the population                           | 45/day    | 50/day |
| $\bar{R}_0$            | Annual average basic reproduction number                            | 3.4       | 3.2    |
| $a$                    | Amplitude of the seasonal fluctuation of $R_0$                      | 0.43      | 0.35   |
| $t_{R_0\text{max}}$    | Day when $R_0$ reaches its maximum                                  | 300       | 335    |
| $t_{\text{Iso1}}$      | Day of beginning of case isolation measures                         | 30        | 20     |
| $t_{\text{Iso2}}$      | Day of end of case isolation measures                               | 750       | 800    |
| $Q_{\text{max}}$       | Maximum capacity of isolation units per 10 000                      | 200       | 30     |
| $n^{(\text{Ge})}$      | Average number of daily contacts of an individual in Ge             | 50        | 60     |
| $n^{(\text{St})}$      | Average number of daily contacts of an individual in St             | 50        | 60     |
| $n^{(\text{Ri})}$      | Average number of daily contacts of an individual in Ri             | 30        | 60     |
| $x$                    | prob. for individual in Ge to meet with individual in Ge            | 99.50%    | 99.92% |
| $y$                    | prob. for individual in Ge to meet with individual in St            | 0.30%     | 0.07%  |
| $u$                    | prob. for individual in St to meet with individual in Ge            | 49.08%    | 54.47% |
| $v$                    | prob. for individual in the St to meet individual of the St         | 20.0%     | 20.0%  |
| $p$                    | prob. for individual in Ri to meet individual of the Ge             | 38.95%    | 2.35%  |
| $q$                    | prob. for individual in Ri to meet individual in St                 | 36.81%    | 7.71%  |
| $c_P$                  | Relative infectiousness in prodromal period                         |           | 0.5    |
| $c_I$                  | Relative infectiousness in fully infectious stage                   |           | 1      |
| $c_L$                  | Relative infectiousness in late infectious stage                    |           | 0.5    |
| $\beta_P(t)$           | Seasonally varying effective contact rate of prodromal ind.         |           | (23a)  |
| $\beta_I(t)$           | Seasonally varying effective contact rate of fully infectious ind.s |           | (23b)  |
| $\beta_L(t)$           | Seasonally varying effective contact rate of late infectious ind.   |           | (23c)  |
| $p_{\text{Home}}$      | Contact reduction in home isolation                                 |           | 75%    |

Description of parameters and their initial values chosen for the simulations. Equation numbers refer to S1 Appendix
