# Supplementary material for: Preventing COVID-19 spread in closed facilities by regular testing of employees—An efficient intervention in long-term care facilities and prisons?
Source: PubMed Central journal article supplement (PMC8062045; doi:10.1371/journal.pone.0249588), 2021-04-22
Supplement: pone.0249588.s013.pdf [file pone.0249588.s013.pdf]

**S6 Table.** Contact reduction parameters chosen for the simulations of Germany.

| Parameter                                   | Description                                                  | $I_1$ | $I_2$  | $I_3$   | $I_4$   | $I_5$   | $I_6$   |
|---------------------------------------------|--------------------------------------------------------------|-------|--------|---------|---------|---------|---------|
| $t_{\text{Dist}_n} - t_{\text{Dist}_{n+1}}$ | Time intervals of gen. cont. red.                            | 40-82 | 82-246 | 246-280 | 280-380 | 380-450 | 450-750 |
|                                             | Fraction of avoided contacts in time intervals $I_k$ between |       |        |         |         |         |         |
| $p_{\text{Cont}}^{(\text{Ge,Ge})}$          | Ge and Ge                                                    | 0.70  | 0.40   | 0.50    | 0.68    | 0.50    | 0       |
| $p_{\text{Cont}}^{(\text{Ge,St})}$          | Ge and St                                                    | 0.70  | 0.40   | 0.50    | 0.68    | 0.50    | 0       |
| $p_{\text{Cont}}^{(\text{Ge,Ri})}$          | Ge and Ri                                                    | 0.60  | 0.20   | 0.40    | 0.50    | 0.40    | 0       |
| $p_{\text{Cont}}^{(\text{St,St})}$          | St and St                                                    | 0.60  | 0.40   | 0.50    | 0.50    | 0.50    | 0.50    |
| $p_{\text{Cont}}^{(\text{St,Ri})}$          | St and Ri                                                    | 0.35  | 0.20   | 0.20    | 0.35    | 0.35    | 0.35    |
| $p_{\text{Cont}}^{(\text{Ri,Ri})}$          | Ri and Ri                                                    | 0.40  | 0.20   | 0.30    | 0.40    | 0.40    | 0.30    |
