# Supplementary material for: Preventing COVID-19 spread in closed facilities by regular testing of employees—An efficient intervention in long-term care facilities and prisons?
Source: PubMed Central journal article supplement (PMC8062045; doi:10.1371/journal.pone.0249588), 2021-04-22
Supplement: pone.0249588.s014.pdf [file pone.0249588.s014.pdf]

**S7 Table.** Contact reduction parameters chosen for the simulations of USA.

| Parameter                                   | $I_1$                                                        | $I_2$   | $I_3$   | $I_4$   | $I_5$   | $I_6$   | $I_7$   | $I_8$   | $I_9$   | $I_{10}$ | $I_{11}$ |
|---------------------------------------------|--------------------------------------------------------------|---------|---------|---------|---------|---------|---------|---------|---------|----------|----------|
| $t_{\text{Dist}_n} - t_{\text{Dist}_{n+1}}$ | 50-115                                                       | 115-190 | 190-255 | 255-290 | 290-309 | 309-316 | 316-325 | 325-335 | 335-354 | 354-450  | 450-800  |
|                                             | Fraction of avoided contacts in time intervals $I_k$ between |         |         |         |         |         |         |         |         |          |          |
| $p_{\text{Cont}}^{(\text{Ge},\text{Ge})}$   | 0.55                                                         | 0.22    | 0.55    | 0.45    | 0.65    | 0.55    | 0.60    | 0.70    | 0.55    | 0.70     | 0        |
| $p_{\text{Cont}}^{(\text{Ge},\text{St})}$   | 0.55                                                         | 0.22    | 0.55    | 0.45    | 0.65    | 0.55    | 0.60    | 0.70    | 0.55    | 0.70     | 0        |
| $p_{\text{Cont}}^{(\text{Ge},\text{Ri})}$   | 0.55                                                         | 0.22    | 0.55    | 0.45    | 0.65    | 0.55    | 0.60    | 0.70    | 0.55    | 0.70     | 0        |
| $p_{\text{Cont}}^{(\text{St},\text{St})}$   | 0.37                                                         | 0.05    | 0.50    | 0.30    | 0.55    | 0.40    | 0.50    | 0.55    | 0.45    | 0.55     | 0.50     |
| $p_{\text{Cont}}^{(\text{St},\text{Ri})}$   | 0.20                                                         | 0.05    | 0.50    | 0.25    | 0.45    | 0.30    | 0.35    | 0.45    | 0.35    | 0.45     | 0.40     |
| $p_{\text{Cont}}^{(\text{Ri},\text{Ri})}$   | 0.05                                                         | 0.00    | 0.25    | 0.20    | 0.25    | 0.22    | 0.20    | 0.30    | 0.20    | 0.25     | 0.20     |
